# Supplementary material
Source: MDPI journal article supplement (https://www.mdpi.com/2813-0618/2/1/5)
Supplement: s1 [file s1 › pharmacoepidemiology-2152505-supplementary.pdf]

# Prescribing Patterns of Antibiotics according to the WHO AWaRe Classification during the COVID-19 Pandemic at a Teaching Hospital in Lusaka, Zambia: Implications for Strengthening of Antimicrobial Stewardship Programmes

## Data Collection Tool

| No. | Age (years) | Gender                          | Name of Antibiotic | Class of Antibiotic             | Dose | Frequency | Duration (Days) | Disease condition | Category of the patient              |
|-----|-------------|---------------------------------|--------------------|---------------------------------|------|-----------|-----------------|-------------------|--------------------------------------|
| 1.  |             | Male <input type="checkbox"/>   |                    | Access <input type="checkbox"/> |      |           |                 |                   | Out-patient <input type="checkbox"/> |
|     |             | Female <input type="checkbox"/> |                    | Watch <input type="checkbox"/>  |      |           |                 |                   | In-patient <input type="checkbox"/>  |
| 2.  |             | Male <input type="checkbox"/>   |                    | Access <input type="checkbox"/> |      |           |                 |                   | Out-patient <input type="checkbox"/> |
|     |             | Female <input type="checkbox"/> |                    | Watch <input type="checkbox"/>  |      |           |                 |                   | In-patient <input type="checkbox"/>  |
| 3.  |             | Male <input type="checkbox"/>   |                    | Access <input type="checkbox"/> |      |           |                 |                   | Out-patient <input type="checkbox"/> |
|     |             | Female <input type="checkbox"/> |                    | Watch <input type="checkbox"/>  |      |           |                 |                   | In-patient <input type="checkbox"/>  |
| 4.  |             | Male <input type="checkbox"/>   |                    | Access <input type="checkbox"/> |      |           |                 |                   | Out-patient <input type="checkbox"/> |
|     |             | Female <input type="checkbox"/> |                    | Watch <input type="checkbox"/>  |      |           |                 |                   | In-patient <input type="checkbox"/>  |
| 5.  |             | Male <input type="checkbox"/>   |                    | Access <input type="checkbox"/> |      |           |                 |                   | Out-patient <input type="checkbox"/> |
|     |             | Female <input type="checkbox"/> |                    | Watch <input type="checkbox"/>  |      |           |                 |                   | In-patient <input type="checkbox"/>  |
| 6.  |             | Male <input type="checkbox"/>   |                    | Access <input type="checkbox"/> |      |           |                 |                   | Out-patient <input type="checkbox"/> |
|     |             | Female <input type="checkbox"/> |                    | Watch <input type="checkbox"/>  |      |           |                 |                   | In-patient <input type="checkbox"/>  |
| 7.  |             | Male <input type="checkbox"/>   |                    | Access <input type="checkbox"/> |      |           |                 |                   | Out-patient <input type="checkbox"/> |
|     |             | Female <input type="checkbox"/> |                    | Watch <input type="checkbox"/>  |      |           |                 |                   | In-patient <input type="checkbox"/>  |
| 8.  |             | Male <input type="checkbox"/>   |                    | Access <input type="checkbox"/> |      |           |                 |                   | Out-patient <input type="checkbox"/> |
|     |             | Female <input type="checkbox"/> |                    | Watch <input type="checkbox"/>  |      |           |                 |                   | In-patient <input type="checkbox"/>  |
| 9.  |             | Male <input type="checkbox"/>   |                    | Access <input type="checkbox"/> |      |           |                 |                   | Out-patient <input type="checkbox"/> |
|     |             | Female <input type="checkbox"/> |                    | Watch <input type="checkbox"/>  |      |           |                 |                   | In-patient <input type="checkbox"/>  |
| 10. |             | Male <input type="checkbox"/>   |                    | Access <input type="checkbox"/> |      |           |                 |                   | Out-patient <input type="checkbox"/> |
|     |             | Female <input type="checkbox"/> |                    | Watch <input type="checkbox"/>  |      |           |                 |                   | In-patient <input type="checkbox"/>  |
|     |             |                                 |                    |                                 |      |           |                 |                   |                                      |
